# Supplementary material for: Two platinum(ii) complexes with a 4-phenyl-4H-1,2,4-triazole derivative as an ancillary ligand for efficient green OLEDs
Source: Royal Society of Chemistry journal article supplement (doi:10.1039/c8dt04750b), 2018-12-28
Supplement: c8dt04750b1.pdf [file c8dt04750b1.pdf]

## Supporting Information

### Two platinum(II) complexes with the 4-phenyl-4*H*-1,2,4-triazole derivative as ancillary ligand for efficient green OLEDs

Guang-Zhao Lu<sup>1,2#</sup>, Zhen-Long Tu<sup>1#</sup>, Liang Liu<sup>1</sup>, You-Xuan Zheng<sup>1\*</sup>, Yue Zhao<sup>1\*</sup>

<sup>1</sup>State Key Laboratory of Coordination Chemistry, Collaborative Innovation Center of Advanced Microstructures, School of Chemistry and Chemical Engineering, Nanjing University, Nanjing 210093, P. R. China, E-mail: yxzheng@nju.edu.cn, zhaoyue@nju.edu.cn

<sup>2</sup>Shenzhen Key Laboratory of Polymer Science and Technology, College of Materials Science and Engineering, Shenzhen University, Shenzhen 518060, P.R. China, E-mail: gzhlu@szu.edu.cn

<sup>#</sup>Lu and <sup>#</sup>Tu have the same contributions to this paper.

**1. Materials and Measurements.** All reagents and chemicals were purchased from commercial sources and used without further purification. <sup>1</sup>H NMR spectra were measured on a Bruker AM 400 spectrometer. Mass spectrometry (MS) spectra were obtained on an electrospray ionization (ESI) mass spectrometer (LCQ fleet, Thermo Fisher Scientific) for ligands and high-resolution electrospray mass spectra (HRMS) was measured on G6500 from Agilent for complexes. Elemental analyses for C, H, and N were performed on an Elementar Vario MICRO analyzer. TG-DSC measurements were carried out on a DSC 823e analyzer (METTLER). Absorption and photoluminescence spectra were measured on a UV-3100 spectrophotometer and a Hitachi F-4600 photoluminescence spectrophotometer, respectively. The decay lifetimes were measured with an Edinburgh Instruments FLS-920 fluorescence spectrometer in degassed CH<sub>2</sub>Cl<sub>2</sub> solution at room temperature. The luminescence quantum efficiencies were calculated by comparison of the emission intensities (integrated areas) of a standard sample (*fac*-Ir(ppy)<sub>3</sub>) and the unknown sample.<sup>1</sup>

**2. Synthesis of the main ligand TN<sub>3</sub>T.**<sup>2</sup> A stirred solution of 2,6-bis-(trifluoromethyl)pyridine (0.215 g, 10 mmol) in diethyl ether (20 mL) was cooled to -78 °C. LDA (lithium diisopropylamide, 6.0 mL, 10 mmol) was added over 20 min and stirred for 1 h, and then B(OPr-*i*)<sub>3</sub> (2.89 mL, 12.4 mmol) was added. The mixture was warmed to room temperature and stirred for another 1 h. The pH was adjusted to 10 by the slow addition of 10% aqueous NaOH solution (20 mL). After 1 hour,

the organic phase was acidified to pH = 4 by the dropwise addition of 3 N HCl. The extraction with ethyl acetate and evaporation of the organic phase gave the crude corresponding aryl boronic acids. 2-Bromopyridine (1 mL, 10 mmol) and tetrakis(triphenylphosphine)palladium<sup>0</sup> (0.34 g, 0.3 mmol) and the boronic acids were added in 50 mL THF. After 20 mL of aqueous 2 N K<sub>2</sub>CO<sub>3</sub> was delivered, the reaction mixture was heated at 70 °C for 1 day under an nitrogen atmosphere. The mixture was poured into water and extracted with CH<sub>2</sub>Cl<sub>2</sub> (10 mL×3 times). Finally, silica column purification (n-hexane: EtOAc = 7: 1 as eluant) gave the colorless liquid 2',6'-bis(trifluoromethyl)-2,3'-bipyridine (**TN<sub>3</sub>T**, 10% Yield). <sup>1</sup>H NMR (400 MHz, CDCl<sub>3</sub>) δ 8.74 (d, *J* = 4.2 Hz, 1H), 8.14 (d, *J* = 8.0 Hz, 1H), 7.96 (d, *J* = 8.0 Hz, 1H), 7.85 (t, *J* = 7.2 Hz, 1H), 7.50 (d, *J* = 7.8 Hz, 1H), 7.46-7.38 (m, 1H). ESI-MS, *m/z*: Calcd for C<sub>12</sub>H<sub>6</sub>F<sub>6</sub>N<sub>2</sub>, 292.18 [M]; found 293.25 [M + H]<sup>+</sup>.

**3. X-ray Crystallography.** The single crystals of complexes were carried out on a Bruker SMART CCD diffractometer using monochromated Mo K $\alpha$  radiation ( $\lambda$  = 0.71073 Å) at room temperature. Cell parameters were retrieved using SMART software and refined using SAINT <sup>3</sup> on all observed reflections. Data were collected using a narrow-frame method with scan widths of 0.30° in  $\omega$  and an exposure time of 10 s/frame. The highly redundant data sets were reduced using SAINT and corrected for Lorentz and polarization effects. Absorption corrections were applied using SADABS <sup>4</sup> supplied by Bruker. The structures were solved by direct methods and refined by full-matrix least-squares on *F*<sup>2</sup> using the program SHELXS-97.<sup>5</sup> The positions of metal atoms and their first coordination spheres were located from direct-methods E-maps; other non-hydrogen atoms were found in alternating difference Fourier syntheses and least-squares refinement cycles and, during the final cycles, refined anisotropically. Hydrogen atoms were placed in calculated position and refined as riding atoms with a uniform value of Uiso.

**4. Details of cyclic voltammetry measurements and theoretical calculations.** Cyclic voltammetry measurements were conducted on a MPI-A multifunctional electrochemical and chemiluminescent system (Xi'an Remex Analytical Instrument Ltd. Co., China) at room temperature, with a polished Pt plate as the working electrode, platinum thread as the counter electrode and Ag-AgNO<sub>3</sub> (0.1 M) in CH<sub>2</sub>Cl<sub>2</sub> as the reference electrode, *tetra*-n-butylammonium perchlorate (0.1 M) was used as the supporting electrolyte, using Fc<sup>+</sup>/Fc as the internal standard, the scan rate was 0.1 V/s. We perform theoretical calculations employing Gaussian09 software

with B3LYP function.<sup>6</sup> The basis set of 6-31G(d, p) was used for C, H, N, O, and F atoms while the LanL2DZ basis set was employed for Ir atoms.<sup>7</sup> The solvent effect of CH<sub>2</sub>Cl<sub>2</sub> was taken into consideration using conductor like polarizable continuum model (C-PCM).<sup>8</sup>

**5. OLEDs fabrication and measurement.** All OLEDs were fabricated on the pre-patterned ITO-coated glass substrate with a sheet resistance of 15  $\Omega$ /sq. The deposition rate for organic compounds is 1-2  $\text{\AA}$ /s. The phosphor and the host TCTA or 2,6DCzPPy were co-evaporated to form emitting layer from two separate sources. The cathode consisting of LiF / Al was deposited by evaporation of LiF with a deposition rate of 0.1  $\text{\AA}$ /s and then by evaporation of Al metal with a rate of 3  $\text{\AA}$ /s. The characteristic curves of the devices were measured with a computer which controlled KEITHLEY 2400 source meter with a calibrated silicon diode in air without device encapsulation. On the basis of the uncorrected PL and EL spectra, the Commission Internationale de l'Eclairage (CIE) coordinates were calculated using a test program of the Spectra scan PR650 spectrophotometer.

**1. Table S1.** The crystallographic data of (4tfmpppy)Pt(dptp).

|                             | (4tfmpppy)Pt(dptp)                                                |
|-----------------------------|-------------------------------------------------------------------|
| Formula                     | C <sub>32</sub> H <sub>21</sub> F <sub>3</sub> N <sub>4</sub> OPt |
| FW                          | 729.62                                                            |
| T (K)                       | 153(2)                                                            |
| Wavelength ( $\text{\AA}$ ) | 0.71073                                                           |
| Cryst syst                  | Monoclinic                                                        |
| Space group                 | <i>P2(1)/n</i>                                                    |
| <i>a</i> ( $\text{\AA}$ )   | 6.4865(17)                                                        |
| <i>b</i> ( $\text{\AA}$ )   | 33.878(9)                                                         |
| <i>c</i> ( $\text{\AA}$ )   | 24.134(7)                                                         |
| $\alpha$ (deg)              | 90                                                                |
| $\beta$ (deg)               | 94.039(6)                                                         |
| $\gamma$ (deg)              | 90                                                                |
| <i>V</i> ( $\text{\AA}^3$ ) | 5290(2)                                                           |
| <i>Z</i>                    | 8                                                                 |

|                                                        |                |
|--------------------------------------------------------|----------------|
| $\rho_{\text{caled}} \text{ (g/cm}^3\text{)}$          | 1.832          |
| $\mu \text{ (Mo K}\alpha\text{) (mm}^{-1}\text{)}$     | 5.360          |
| $F(000)$                                               | 2832           |
| Range of transm factors (deg)                          | 2.405-23.256   |
| Reflns collected                                       | 24010          |
| Unique                                                 | 7592           |
| GOF on $F^2$                                           | 1.111          |
| $R_I^a, wR_2^b \text{ (I} > 2\sigma(\text{I})\text{)}$ | 0.0802, 0.1531 |
| $R_I^a, wR_2^b \text{ (all data)}$                     | 0.1587, 0.1864 |
| CCDC NO.                                               | 1832372        |

$$R_I^a = \Sigma ||F_o| - |F_c|| / \Sigma |F_o|. \quad wR_2^b = [\Sigma w(F_o^2 - F_c^2)^2 / \Sigma w(F_o^2)]^{1/2}.$$

**2. Table S2. Selected bond lengths and angles of (4tfmpppy)Pt(dptp).**

| <b>(4tfmpppy)Pt(dptp)</b> |              |
|---------------------------|--------------|
| Selected bonds            |              |
| Pt1-C1                    | 2.00(2)      |
| Pt1-N1                    | 2.018(15)    |
| Pt1-N2                    | 2.030(16)    |
| Pt1-O1                    | 2.070(14)    |
| Selected angels           |              |
| C1-Pt1-N1                 | 81.8(8)      |
| N2-Pt1-O1                 | 89.1(6)      |
| C1-Pt1-O1                 | 170.8(7)     |
| N1-Pt1-N2                 | 177.2(6)     |
| Selected torsion angels   |              |
| C1-Pt1-N1-O1              | 176.511(678) |
| N1-Pt1-O1-N2              | 177.427(665) |

**8. Table S3.** The electronic cloud density distribution.

| Complex                    | Orbital | Energy/eV    | Energy/eV      | Composition (%) |       |                   |
|----------------------------|---------|--------------|----------------|-----------------|-------|-------------------|
|                            |         | (Calculated) | (Experimental) | Main Ligands    | Pt    | Ancillary Ligands |
| (TN <sub>3</sub> T)Pt(dtp) | HOMO    | -5.40        | -5.46          | 4.84            | 13.22 | 81.94             |
|                            | LUMO    | -2.23        | -2.93          | 92.43           | 5.08  | 2.49              |
| (4tfmpppy)Pt(dtp)          | HOMO    | -5.25        | -5.31          | 7.29            | 18.02 | 74.69             |
|                            | LUMO    | -1.89        | -2.68          | 91.28           | 5.37  | 3.35              |

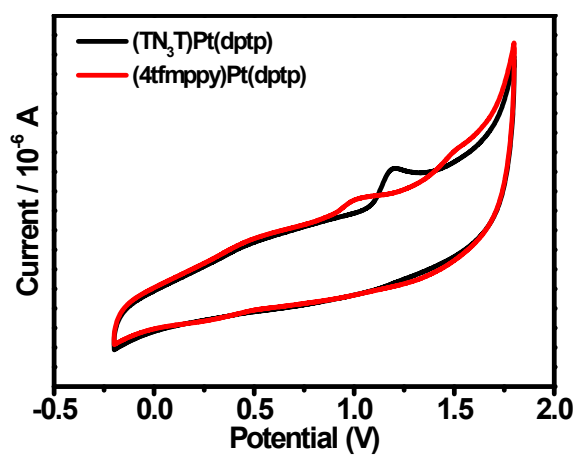**9. Figure S1.** Cyclic voltammograms of complexes the platinum(II) complexes.

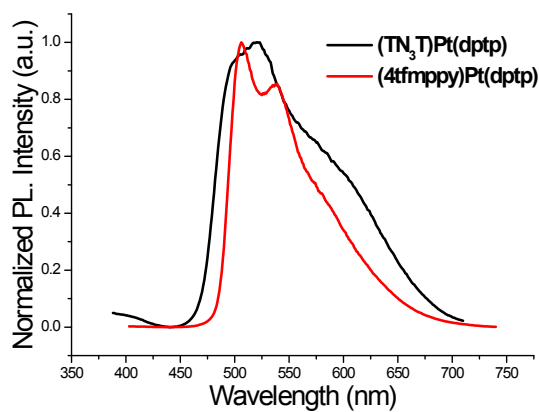

10. **Figure S2.** The emission spectra of Pt(II) complexes doped TCTA films (16 wt%).

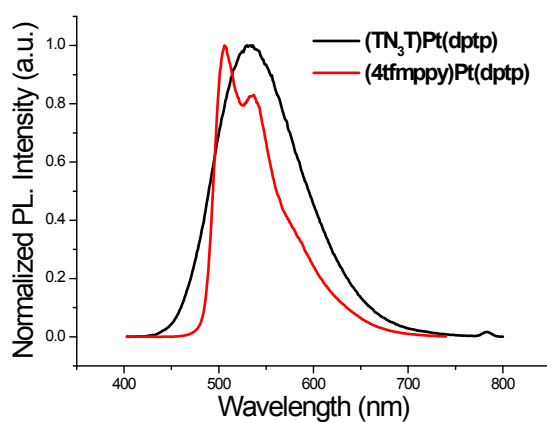

11. **Figure S3.** The emission spectra of Pt(II) complexes doped 2,6DCzPPy films (16 wt%).

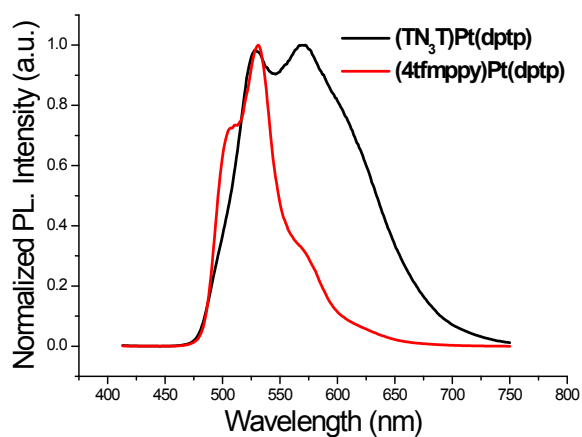

12. **Figure S4.** The emission spectra of Pt(II) complexes in power solid states.

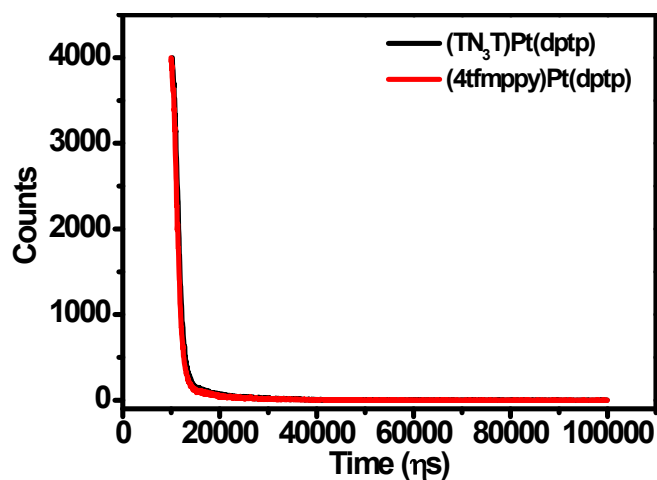

13. **Figure S5.** The selected lifetime curves of the platinum(II) complexes in degassed  $\text{CH}_2\text{Cl}_2$  solution.

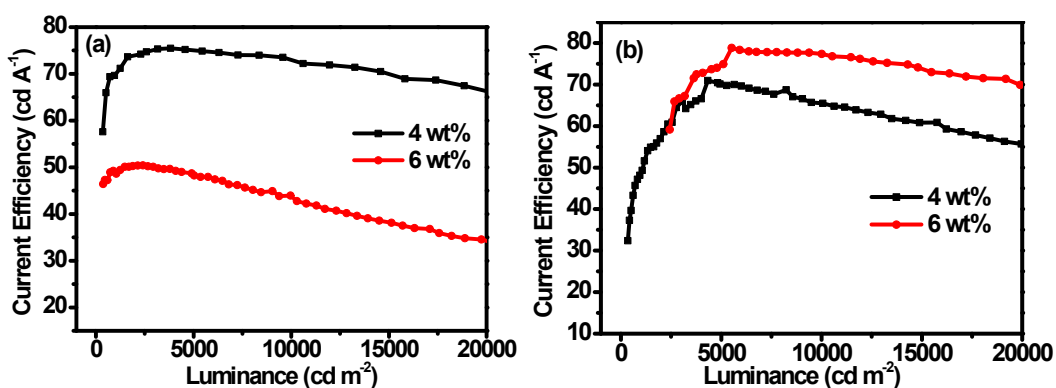

14. **Figure S6.** Current efficiency versus luminance curves of single-layer-emitting devices with different doped concentrations: (a) for  $(\text{TN}_3\text{T})\text{Pt}(\text{dtp})$ ; (b) for  $(4\text{tfmppy})\text{Pt}(\text{dtp})$ .

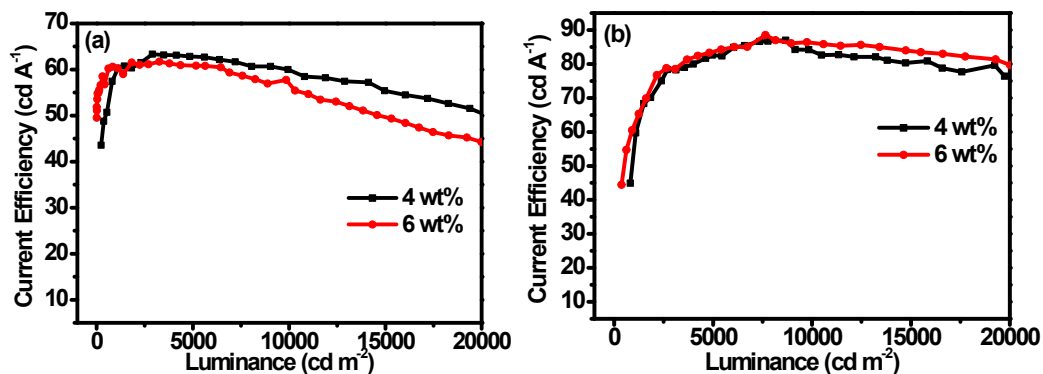

15. **Figure S7.** Current efficiency versus luminance curves of double-layer-emitting devices with different doped concentrations: (a) for  $(\text{TN}_3\text{T})\text{Pt}(\text{dtp})$ ; (b) for  $(4\text{tfmppy})\text{Pt}(\text{dtp})$ .

## References:

- (1) D. P. Rillema, D. G. Taghdiri, D. S. Jones, C. D. Keller, L. A. Worl, T. J. Meyer and H. A. Levy, *Inorg. Chem.*, 1987, **26**, 578.
- (2) F. Jerald, D. V. Giang, D. M. Charles, C. G. Troy, P. Kyung-Ho, S. M. Jeffrey, J. M. Will, B. Joseph, M. B. Lois, D. D. Kerwin, H. S. Thomas and G. Z. Steve, *Organometallics*, 2015, **34**, 3665.
- (3) *SAINT-Plus*, version 6.02, Bruker Analytical X-ray System, Madison, WI, 1999.
- (4) Sheldrick, G. M. *SADABS An empirical absorption correction program*, Bruker Analytical X-ray Systems, Madison, WI, 1996.
- (5) Sheldrick, G. M. *SHELXTL-97*. Universität of Göttingen, Göttingen, Germany, 1997.
- (6) E. Runge and E. K. U. Gross, *Phys. Rev. Lett.*, 1984, **52**, 997.
- (7) M. J. Frisch, G. W. Trucks, H. B. Schlegel, G. E. Scuseria, M. A. Robb, J. R. Cheeseman, G. Scalmani, V. Barone, B. Mennucci, G. A. Petersson, H. Nakatsuji, M. Caricato, X. Li, H. P. Hratchian, A. F. Izmaylov, J. Bloino, G. Zheng, J. L. Sonnenberg, M. Hada, M. Ehara, K. Toyota, R. Fukuda, J. Hasegawa, M. Ishida, T. Nakajima, Y. Honda, O. Kitao, H. Nakai, T. Vreven, J. A. Montgomery Jr., J. E. Peralta, F. Ogliaro, M. Bearpark, J. J. Heyd, E. Brothers, K. N. Kudin, V. N. Staroverov, R. Kobayashi, J. Normand, K. Raghavachari, A. Rendell, J. C. Burant, S. S. Iyengar, J. Tomasi, M. Cossi, N. Rega, J. M. Millam, M. Klene, J. E. Knox, J. B. Cross, V. Bakken, C. Adamo, J. Jaramillo, R. Gomperts, R. E. Stratmann, O. Yazyev, A. J. Austin, R. Cammi, C. Pomelli, J. W. Ochterski, R. L. Martin, K. Morokuma, V. G. Zakrzewski, G. A. Voth, P. Salvador, J. J. Dannenberg, S. Dapprich, A. D. Daniels, O. Farkas, J. B. Foresman, J. V. Ortiz, J. Cioslowski, D. J. Fox, Gaussian 09, Revision A.01, Gaussian, Inc., Wallingford, CT, 2009.
- (8) (a) P. J. Hay and W. R. Wadt, *J. Chem. Phys.*, 1985, **82**, 299; (b) M. M. Francl, W. J. Pietro, W. J. Hehre, J. S. Binkley, M. S. Gordon, D. J. Defrees and J. A. Pople, *J. Chem. Phys.*, 1982, **77**, 3654.
